# Supplementary material
Source: PubMed Central journal article supplement (PMC3065959)

## Supporting Information

### **Straightforward, effective calibration of SPINAL-64 decoupling for biomolecular solid-state NMR**

Gemma C. Comellas<sup>§</sup>, Andrew J. Nieuwkoop<sup>‡</sup>, Jakob J. Lopez<sup>‡</sup>, Luisel R. Lemkau<sup>‡</sup>, Chad M. Rienstra<sup>††, §, †, ‥</sup>

<sup>§</sup>Center for Biophysics and Computational Biology, <sup>‡</sup>Department of Chemistry, and

<sup>‡</sup> Department of Biochemistry, University of Illinois at Urbana-Champaign, 600 South

Mathews Avenue, Urbana, Illinois 61801

<sup>††</sup>Corresponding author information: Chad M. Rienstra,

Department of Chemistry, University of Illinois at Urbana-Champaign,

600 South Mathews Avenue, Urbana, IL 61801.

Telephone: (+01) 217 244-4655. Fax: 217 244-3186. E-mail: rienstra@scs.illinois.edu

## Figure Caption

Fig. S1. Comparison of 2D spectra of A30P AS fibrils. <sup>13</sup>C<sup>13</sup>C 2D with 50 ms DARR mixing with (a) optimal reported values ( $\tau_p = (11/12)\pi = 5.7$ ,  $\varphi = 10^\circ$ ,  $\alpha = 5^\circ$  and  $\beta = 10^\circ$ ) [9] and (b) optimized values of SPINAL <sup>1</sup>H decoupling (80 kHz). <sup>15</sup>N<sup>13</sup>C (NCA) 2D spectra with (c) optimal reported values [9] and (d) optimized SPINAL <sup>1</sup>H decoupling (80 kHz). Both spectra were acquired under identical conditions at 600 MHz (<sup>1</sup>H frequency) and 13.333 kHz MAS rate. Contour levels were drawn at 7  $\sigma$ . Dashed rectangle indicates the expanded region shown in Fig. 3.

# FIGURE

Fig. S1.

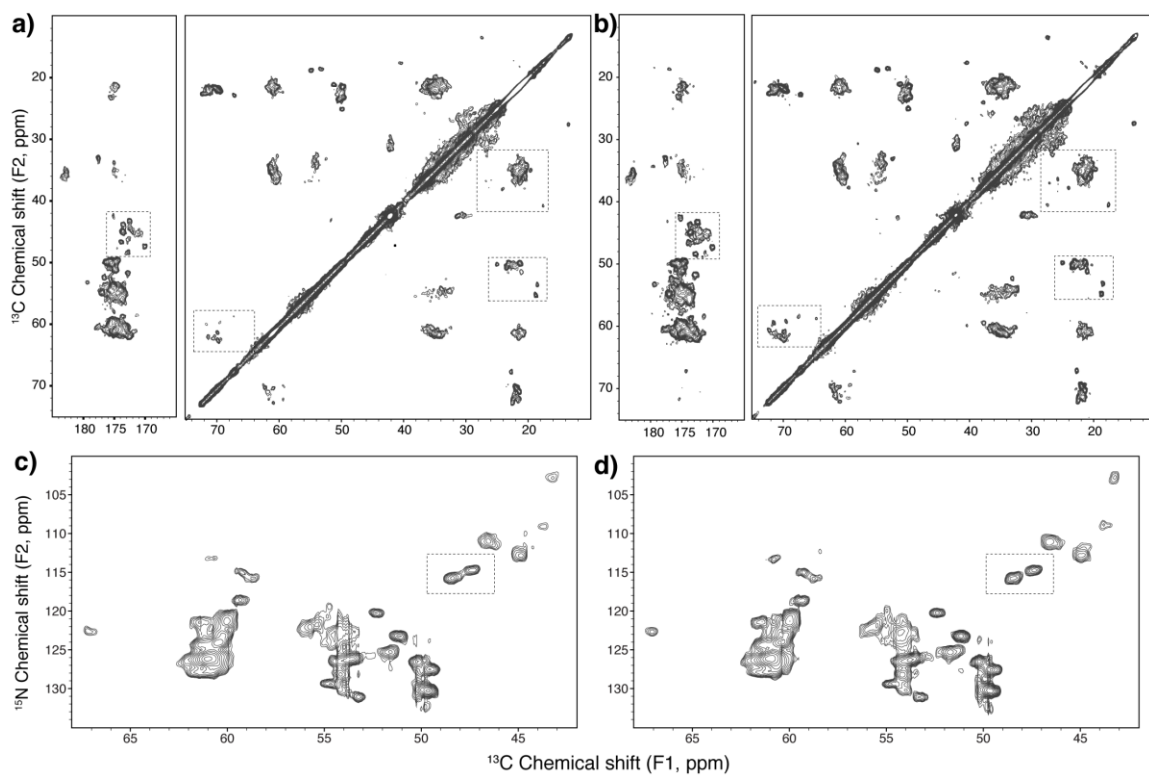

Supplement: NIHMS271822-supplement-01.pdf [file NIHMS271822-supplement-01.pdf]
